# Supplementary material for: Farmer Perceptions of Land Cover Classification of UAS Imagery of Coffee Agroecosystems in Puerto Rico
Source: Preprints.org preprint supplement (doi:10.20944/preprints202403.0379.v1), 2024-03-07
Supplement: Supplementary file 1 [file supplementary]

**Table 1.** Accuracy assessment of farm utua2.

| Class Value                             | C_1 | C_2          | C_3          | C_4           | C_5          | C_6 | C_7          | C_8          | C_10         | Total | Users Accuracy      | Kappa               |
|-----------------------------------------|-----|--------------|--------------|---------------|--------------|-----|--------------|--------------|--------------|-------|---------------------|---------------------|
| C_1 - Coffee                            | 7   | 1            | 6            | 14            | 4            | 0   | 0            | 0            | 17           | 49    | 0.1428571429        | 0                   |
| C_2 - Citrus                            | 1   | 10           | 3            | 12            | 6            | 0   | 2            | 2            | 19           | 55    | 0.1818181818        | 0                   |
| C_3 - Banana                            | 1   | 0            | 5            | 7             | 5            | 3   | 0            | 6            | 2            | 29    | 0.1724137931        | 0                   |
| C_4 - Palm                              | 0   | 2            | 0            | 3             | 4            | 0   | 0            | 0            | 16           | 25    | 0.12                | 0                   |
| C_5 - Grasses/Low Herbaceous Vegetation | 0   | 2            | 0            | 3             | 24           | 0   | 0            | 0            | 2            | 31    | 0.7741935484        | 0                   |
| C_6 - Bare Earth                        | 1   | 0            | 0            | 1             | 0            | 7   | 3            | 10           | 1            | 23    | 0.3043478261        | 0                   |
| C_7 - Paved                             | 0   | 0            | 0            | 0             | 0            | 0   | 10           | 0            | 0            | 10    | 1                   | 0                   |
| C_8 - Buildings                         | 0   | 0            | 0            | 1             | 0            | 0   | 0            | 96           | 0            | 97    | 0.9896907216        | 0                   |
| C_10 - Overstory Vegetation             | 0   | 0            | 3            | 32            | 6            | 0   | 20           | 0            | 127          | 188   | 0.6755319149        | 0                   |
| <b>Total</b>                            | 10  | 15           | 17           | 73            | 49           | 10  | 35           | 114          | 184          | 507   | 0                   | 0                   |
| <b>Producers Accuracy</b>               | 0.7 | 0.6666666667 | 0.2941176471 | 0.04109589041 | 0.4897959184 | 0.7 | 0.2857142857 | 0.8421052632 | 0.6902173913 | 0     | <b>0.5700197239</b> | 0                   |
| <b>Kappa</b>                            | 0   | 0            | 0            | 0             | 0            | 0   | 0            | 0            | 0            | 0     | 0                   | <b>0.4625973054</b> |

**Table 2.** Accuracy assessment of farm utua16.

| Class Value                             | C_1 | C_3 | C_4          | C_5  | C_6 | C_7 | C_8          | C_9 | C_10        | Total | Users Accuracy | Kappa               |
|-----------------------------------------|-----|-----|--------------|------|-----|-----|--------------|-----|-------------|-------|----------------|---------------------|
| C_1 - Coffee                            | 0   | 1   | 15           | 12   | 0   | 0   | 0            | 0   | 62          | 90    | 0              | 0                   |
| C_3 - Banana                            | 0   | 8   | 16           | 4    | 0   | 0   | 1            | 0   | 67          | 96    | 0.0833333333   | 0                   |
| C_4 - Palm                              | 0   | 1   | 26           | 10   | 0   | 0   | 3            | 0   | 33          | 73    | 0.3561643836   | 0                   |
| C_5 - Grasses/Low Herbaceous Vegetation | 0   | 0   | 0            | 24   | 0   | 0   | 0            | 0   | 1           | 25    | 0.96           | 0                   |
| C_6 - Bare Earth                        | 0   | 0   | 0            | 0    | 11  | 0   | 2            | 0   | 0           | 13    | 0.8461538462   | 0                   |
| C_7 - Paved                             | 0   | 0   | 0            | 0    | 0   | 6   | 1            | 0   | 0           | 7     | 0.8571428571   | 0                   |
| C_8 - Buildings                         | 0   | 0   | 0            | 0    | 0   | 6   | 5            | 0   | 0           | 11    | 0.4545454545   | 0                   |
| C_9 - Water                             | 0   | 0   | 0            | 0    | 0   | 0   | 0            | 46  | 0           | 46    | 1              | 0                   |
| C_10 - Overstory Vegetation             | 0   | 0   | 17           | 0    | 0   | 0   | 1            | 0   | 121         | 139   | 0.8705035971   | 0                   |
| <b>Total</b>                            | 0   | 10  | 74           | 50   | 11  | 12  | 13           | 46  | 284         | 500   | 0              | 0                   |
| <b>Producers Accuracy</b>               | 0   | 0.8 | 0.3513513514 | 0.48 | 1   | 0.5 | 0.3846153846 | 1   | 0.426056338 | 0     | <b>0.494</b>   | 0                   |
| <b>Kappa</b>                            | 0   | 0   | 0            | 0    | 0   | 0   | 0            | 0   | 0           | 0     | 0              | <b>0.3688443615</b> |



**Table 5.** Accuracy assessment of farm utua20.

| Class Value                             | C_1 | C_2 | C_3  | C_4 | C_5 | C_6          | C_7 | C_8          | C_10         | Total | Users Accuracy      | Kappa               |
|-----------------------------------------|-----|-----|------|-----|-----|--------------|-----|--------------|--------------|-------|---------------------|---------------------|
| C_1 - Coffee                            | 1   | 0   | 0    | 2   | 7   | 14           | 0   | 5            | 3            | 32    | 0.03125             | 0                   |
| C_2 - Citrus                            | 5   | 0   | 4    | 1   | 1   | 2            | 0   | 0            | 85           | 98    | 0                   | 0                   |
| C_3 - Banana                            | 0   | 0   | 14   | 16  | 2   | 0            | 0   | 0            | 57           | 89    | 0.1573033708        | 0                   |
| C_4 - Palm                              | 0   | 0   | 0    | 0   | 0   | 0            | 0   | 0            | 0            | 0     | 0                   | 0                   |
| C_5 - Grasses/Low Herbaceous Vegetation | 0   | 0   | 0    | 1   | 0   | 7            | 1   | 1            | 0            | 10    | 0                   | 0                   |
| C_6 - Bare Earth                        | 0   | 0   | 1    | 0   | 0   | 5            | 2   | 1            | 1            | 10    | 0.5                 | 0                   |
| C_7 - Paved                             | 0   | 0   | 0    | 5   | 0   | 0            | 7   | 2            | 0            | 14    | 0.5                 | 0                   |
| C_8 - Buildings                         | 0   | 0   | 0    | 0   | 0   | 0            | 0   | 105          | 0            | 105   | 1                   | 0                   |
| C_10 - Overstory Vegetation             | 4   | 0   | 6    | 4   | 0   | 0            | 0   | 2            | 134          | 150   | 0.8933333333        | 0                   |
| <b>Total</b>                            | 10  | 0   | 25   | 29  | 10  | 28           | 10  | 116          | 280          | 508   | 0                   | 0                   |
| <b>Producers Accuracy</b>               | 0.1 | 0   | 0.56 | 0   | 0   | 0.1785714286 | 0.7 | 0.9051724138 | 0.4785714286 | 0     | <b>0.5236220472</b> | 0                   |
| <b>Kappa</b>                            | 0   | 0   | 0    | 0   | 0   | 0            | 0   | 0            | 0            | 0     | 0                   | <b>0.3878268491</b> |

**Table 6.** Accuracy assessment of farm utua30.

| Class Value                             | C_1 | C_3 | C_4 | C_5           | C_6          | C_7          | C_8          | C_10         | Total | Users Accuracy      | Kappa              |
|-----------------------------------------|-----|-----|-----|---------------|--------------|--------------|--------------|--------------|-------|---------------------|--------------------|
| C_1 - Coffee                            | 4   | 5   | 5   | 7             | 4            | 0            | 0            | 48           | 73    | 0.05479452055       | 0                  |
| C_3 - Banana                            | 0   | 3   | 22  | 42            | 5            | 0            | 0            | 31           | 103   | 0.02912621359       | 0                  |
| C_4 - Palm                              | 0   | 0   | 0   | 0             | 0            | 0            | 0            | 0            | 0     | 0                   | 0                  |
| C_5 - Grasses/Low Herbaceous Vegetation | 0   | 0   | 0   | 1             | 0            | 0            | 0            | 2            | 3     | 0.3333333333        | 0                  |
| C_6 - Bare Earth                        | 0   | 0   | 8   | 2             | 28           | 0            | 0            | 0            | 38    | 0.7368421053        | 0                  |
| C_7 - Paved                             | 0   | 0   | 9   | 1             | 1            | 37           | 15           | 0            | 63    | 0.5873015873        | 0                  |
| C_8 - Buildings                         | 0   | 0   | 1   | 0             | 0            | 2            | 38           | 4            | 45    | 0.8444444444        | 0                  |
| C_10 - Overstory Vegetation             | 6   | 2   | 20  | 7             | 0            | 0            | 0            | 151          | 186   | 0.811827957         | 0                  |
| <b>Total</b>                            | 10  | 10  | 65  | 60            | 38           | 39           | 53           | 236          | 511   | 0                   | 0                  |
| <b>Producers Accuracy</b>               | 0.4 | 0.3 | 0   | 0.01666666667 | 0.7368421053 | 0.9487179487 | 0.7169811321 | 0.6398305085 | 0     | <b>0.5127201566</b> | 0                  |
| <b>Kappa</b>                            | 0   | 0   | 0   | 0             | 0            | 0            | 0            | 0            | 0     | 0                   | <b>0.391198044</b> |

**Table 7.** Accuracy assessment of farm yauc4.

| Class Value                             | C_1        | C_3                 | C_4       | C_5        | C_6                 | C_7       | C_8        | C_10                | Total      | Users Accuracy      | Kappa               |
|-----------------------------------------|------------|---------------------|-----------|------------|---------------------|-----------|------------|---------------------|------------|---------------------|---------------------|
| C_1 - Coffee                            | 9          |                     | 9         | 0          | 4                   | 0         | 0          | 0                   | 22         | 0.4090909091        | 0                   |
| C_3 - Banana                            | 0          |                     | 16        | 2          | 2                   | 15        | 0          | 0                   | 37         | 0.4324324324        | 0                   |
| C_4 - Palm                              | 0          |                     | 0         | 0          | 0                   | 0         | 0          | 0                   | 0          | 0                   | 0                   |
| C_5 - Grasses/Low Herbaceous Vegetation | 1          |                     | 2         | 1          | 4                   | 17        | 0          | 0                   | 30         | 0.1333333333        | 0                   |
| C_6 - Bare Earth                        | 0          |                     | 1         | 0          | 0                   | 13        | 0          | 0                   | 16         | 0.8125              | 0                   |
| C_7 - Paved                             | 0          |                     | 0         | 0          | 0                   | 0         | 19         | 0                   | 19         | 1                   | 0                   |
| C_8 - Buildings                         | 0          |                     | 0         | 0          | 0                   | 0         | 0          | 8                   | 8          | 1                   | 0                   |
| C_10 - Overstory Vegetation             | 0          |                     | 2         | 65         | 0                   | 0         | 2          | 307                 | 376        | 0.8164893617        | 0                   |
| <b>Total</b>                            | <b>10</b>  |                     | <b>30</b> | <b>68</b>  | <b>10</b>           | <b>45</b> | <b>19</b>  | <b>316</b>          | <b>508</b> | <b>0</b>            | <b>0</b>            |
| <b>Producers Accuracy</b>               | <b>0.9</b> | <b>0.5333333333</b> | <b>0</b>  | <b>0.4</b> | <b>0.2888888889</b> | <b>1</b>  | <b>0.8</b> | <b>0.9715189873</b> | <b>0</b>   | <b>0.7401574803</b> | <b>0</b>            |
| <b>Kappa</b>                            | <b>0</b>   | <b>0</b>            | <b>0</b>  | <b>0</b>   | <b>0</b>            | <b>0</b>  | <b>0</b>   | <b>0</b>            | <b>0</b>   | <b>0</b>            | <b>0.5085924504</b> |

**Table 8.** Accuracy assessment of farm adju8.

| Class Value                             | C_1        | C_3                 | C_5                 | C_6                 | C_7         | C_8                 | C_9                 | C_10         | Total      | Users Accuracy      | Kappa               |
|-----------------------------------------|------------|---------------------|---------------------|---------------------|-------------|---------------------|---------------------|--------------|------------|---------------------|---------------------|
| C_1 - Coffee                            | 12         |                     | 6                   | 2                   | 1           | 0                   | 10                  | 0            | 41         | 0.2926829268        | 0                   |
| C_3 - Banana                            | 2          |                     | 14                  | 8                   | 0           | 0                   | 1                   | 20           | 41         | 0.1627906977        | 0                   |
| C_5 - Grasses/Low Herbaceous Vegetation | 0          |                     | 6                   | 26                  | 2           | 0                   | 3                   | 0            | 35         | 0.3611111111        | 0                   |
| C_6 - Bare Earth                        | 0          |                     | 1                   | 2                   | 48          | 3                   | 0                   | 0            | 54         | 0.8888888889        | 0                   |
| C_7 - Paved                             | 0          |                     | 0                   | 0                   | 6           | 9                   | 1                   | 0            | 16         | 0.5625              | 0                   |
| C_8 - Buildings                         | 0          |                     | 1                   | 0                   | 0           | 0                   | 27                  | 0            | 29         | 0.9310344828        | 0                   |
| C_9 - Water                             | 0          |                     | 0                   | 0                   | 0           | 0                   | 0                   | 26           | 26         | 1                   | 0                   |
| C_10 - Overstory Vegetation             | 1          |                     | 8                   | 3                   | 0           | 0                   | 0                   | 0            | 38         | 0.76                | 0                   |
| <b>Total</b>                            | <b>15</b>  |                     | <b>36</b>           | <b>41</b>           | <b>57</b>   | <b>12</b>           | <b>42</b>           | <b>46</b>    | <b>125</b> | <b>0</b>            | <b>0</b>            |
| <b>Producers Accuracy</b>               | <b>0.8</b> | <b>0.3888888889</b> | <b>0.6341463415</b> | <b>0.8421052632</b> | <b>0.75</b> | <b>0.6428571429</b> | <b>0.5652173913</b> | <b>0.304</b> | <b>0</b>   | <b>0.5347593583</b> | <b>0</b>            |
| <b>Kappa</b>                            | <b>0</b>   | <b>0</b>            | <b>0</b>            | <b>0</b>            | <b>0</b>    | <b>0</b>            | <b>0</b>            | <b>0</b>     | <b>0</b>   | <b>0</b>            | <b>0.4634190585</b> |

**Table 9.** Accuracy assessment of farm jayu2\_3.

| Class Value                                | C_1 | C_3          | C_4          | C_5          | C_6          | C_7 | C_8          | C_9 | C_10         | Total | Users Accuracy      | Kappa               |   |
|--------------------------------------------|-----|--------------|--------------|--------------|--------------|-----|--------------|-----|--------------|-------|---------------------|---------------------|---|
| C_1 - Coffee                               | 4   |              | 2            | 2            | 4            | 1   | 0            | 3   | 0            | 15    | 31                  | 0.1290322581        | 0 |
| C_3 - Banana                               | 3   |              | 11           | 4            | 1            | 0   | 0            | 1   | 0            | 75    | 95                  | 0.1157894737        | 0 |
| C_4 - Palm                                 | 1   |              | 4            | 7            | 1            | 0   | 0            | 0   | 0            | 23    | 36                  | 0.1944444444        | 0 |
| C_5 - Grasses/Low<br>Herbaceous Vegetation | 1   |              | 3            | 1            | 20           | 1   | 0            | 0   | 0            | 13    | 39                  | 0.5128205128        | 0 |
| C_6 - Bare Earth                           | 0   |              | 0            | 2            | 2            | 16  | 0            | 18  | 0            | 0     | 38                  | 0.4210526316        | 0 |
| C_7 - Paved                                | 0   |              | 0            | 0            | 0            | 1   | 19           | 29  | 1            | 0     | 50                  | 0.38                | 0 |
| C_8 - Buildings                            | 0   |              | 0            | 1            | 0            | 2   | 0            | 132 | 0            | 2     | 137                 | 0.9635036496        | 0 |
| C_9 - Water                                | 0   |              | 0            | 0            | 0            | 0   | 0            | 14  | 9            | 0     | 23                  | 0.3913043478        | 0 |
| C_10 - Overstory Vegetation                | 1   |              | 4            | 0            | 2            | 0   | 0            | 0   | 0            | 46    | 53                  | 0.8679245283        | 0 |
| <b>Total</b>                               | 10  |              | 24           | 17           | 30           | 21  | 19           | 197 | 10           | 174   | 502                 | 0                   | 0 |
| <b>Producers Accuracy</b>                  | 0.4 | 0.4583333333 | 0.4117647059 | 0.6666666667 | 0.7619047619 | 1   | 0.6700507614 | 0.9 | 0.2643678161 | 0     | <b>0.5258964143</b> | 0                   |   |
| <b>Kappa</b>                               | 0   | 0            | 0            | 0            | 0            | 0   | 0            | 0   | 0            | 0     | 0                   | <b>0.4295536256</b> |   |





**Table 14.** Accuracy assessment of Iteration C of farm UTUA2.

| Class Value                             | C_1 | C_2      | C_3      | C_4      | C_5      | C_6 | C_7      | C_8      | C_10     | Total | User's Accuracy | Kappa           |
|-----------------------------------------|-----|----------|----------|----------|----------|-----|----------|----------|----------|-------|-----------------|-----------------|
| C_1 - Coffee                            | 6   | 1        | 2        | 8        | 3        | 0   | 0        | 0        | 35       | 55    | 0.109091        | 0               |
| C_2 - Citrus                            | 0   | 11       | 4        | 24       | 4        | 0   | 4        | 1        | 39       | 87    | 0.126437        | 0               |
| C_3 - Banana                            | 2   | 2        | 5        | 1        | 11       | 1   | 15       | 2        | 5        | 44    | 0.113636        | 0               |
| C_4 - Palm                              | 0   | 0        | 1        | 16       | 6        | 0   | 0        | 0        | 46       | 69    | 0.231884        | 0               |
| C_5 - Grasses/Low Herbaceous Vegetation | 1   | 1        | 0        | 1        | 20       | 0   | 0        | 0        | 0        | 23    | 0.869565        | 0               |
| C_6 - Bare Earth                        | 0   | 0        | 0        | 2        | 0        | 9   | 2        | 18       | 0        | 31    | 0.290323        | 0               |
| C_7 - Paved                             | 0   | 0        | 0        | 0        | 0        | 0   | 11       | 0        | 0        | 11    | 1               | 0               |
| C_8 - Buildings                         | 0   | 0        | 0        | 1        | 0        | 0   | 0        | 93       | 0        | 94    | 0.989362        | 0               |
| C_10 - Overstory Vegetation             | 1   | 0        | 5        | 20       | 5        | 0   | 3        | 0        | 59       | 93    | 0.634409        | 0               |
| <b>Total</b>                            | 10  | 15       | 17       | 73       | 49       | 10  | 35       | 114      | 184      | 507   | 0               | 0               |
| <b>Producer's Accuracy</b>              | 0.6 | 0.733333 | 0.294118 | 0.219178 | 0.408163 | 0.9 | 0.314286 | 0.815789 | 0.320652 | 0     | <b>0.453649</b> | 0               |
| <b>Kappa</b>                            | 0   | 0        | 0        | 0        | 0        | 0   | 0        | 0        | 0        | 0     | 0               | <b>0.360941</b> |

**Table 15.** Accuracy assessment of Iteration C of farm UTUA16.

| Class Value                             | C_1 | C_3 | C_4      | C_5  | C_6      | C_7      | C_8      | C_9      | C_10     | Total | User's Accuracy | Kappa           |
|-----------------------------------------|-----|-----|----------|------|----------|----------|----------|----------|----------|-------|-----------------|-----------------|
| C_1 - Coffee                            | 0   | 4   | 20       | 14   | 0        | 0        | 1        | 0        | 41       | 80    | 0               | 0               |
| C_3 - Banana                            | 0   | 5   | 11       | 0    | 1        | 0        | 0        | 0        | 51       | 68    | 0.073529        | 0               |
| C_4 - Palm                              | 0   | 0   | 23       | 4    | 0        | 0        | 2        | 0        | 45       | 74    | 0.310811        | 0               |
| C_5 - Grasses/Low Herbaceous Vegetation | 0   | 0   | 2        | 32   | 0        | 0        | 0        | 0        | 11       | 45    | 0.711111        | 0               |
| C_6 - Bare Earth                        | 0   | 0   | 0        | 0    | 8        | 0        | 1        | 1        | 0        | 10    | 0.8             | 0               |
| C_7 - Paved                             | 0   | 0   | 0        | 0    | 2        | 5        | 6        | 0        | 0        | 13    | 0.384615        | 0               |
| C_8 - Buildings                         | 0   | 0   | 0        | 0    | 0        | 7        | 3        | 0        | 0        | 10    | 0.3             | 0               |
| C_9 - Water                             | 0   | 0   | 0        | 0    | 0        | 0        | 0        | 45       | 1        | 46    | 0.978261        | 0               |
| C_10 - Overstory Vegetation             | 0   | 1   | 18       | 0    | 0        | 0        | 0        | 0        | 135      | 154   | 0.876623        | 0               |
| <b>Total</b>                            | 0   | 10  | 74       | 50   | 11       | 12       | 13       | 46       | 284      | 500   | 0               | 0               |
| <b>Producer's Accuracy</b>              | 0   | 0.5 | 0.310811 | 0.64 | 0.727273 | 0.416667 | 0.230769 | 0.978261 | 0.475352 | 0     | <b>0.512</b>    | 0               |
| <b>Kappa</b>                            | 0   | 0   | 0        | 0    | 0        | 0        | 0        | 0        | 0        | 0     | 0               | <b>0.375467</b> |

**Table 16.** Accuracy assessment of Iteration C of farm UTUA18.

| Class Value                             | C_1 | C_2 | C_3      | C_5     | C_6      | C_7      | C_8      | C_10     | Total | User's Accuracy | Kappa          |                 |
|-----------------------------------------|-----|-----|----------|---------|----------|----------|----------|----------|-------|-----------------|----------------|-----------------|
| C_1 - Coffee                            | 0   | 0   | 0        | 0       | 0        | 0        | 0        | 0        | 0     | 0               | 0              |                 |
| C_2 - Citrus                            | 0   | 0   | 0        | 0       | 0        | 0        | 0        | 0        | 0     | 0               | 0              |                 |
| C_3 - Banana                            | 3   | 0   | 28       | 10      | 10       | 0        | 0        | 0        | 99    | 150             | 0.186667       | 0               |
| C_5 - Grasses/Low Herbaceous Vegetation | 4   | 10  | 11       | 18      | 6        | 0        | 0        | 0        | 53    | 102             | 0.176471       | 0               |
| C_6 - Bare Earth                        | 0   | 0   | 0        | 0       | 4        | 0        | 2        | 0        | 6     | 6               | 0.666667       | 0               |
| C_7 - Paved                             | 0   | 0   | 0        | 0       | 0        | 19       | 22       | 0        | 41    | 41              | 0.463415       | 0               |
| C_8 - Buildings                         | 0   | 0   | 0        | 0       | 3        | 14       | 58       | 0        | 75    | 75              | 0.773333       | 0               |
| C_10 - Overstory Vegetation             | 3   | 0   | 21       | 1       | 0        | 0        | 0        | 113      | 138   | 138             | 0.818841       | 0               |
| <b>Total</b>                            | 10  | 10  | 60       | 29      | 23       | 33       | 82       | 265      | 512   | 512             | 0              | 0               |
| <b>Producer's Accuracy</b>              | 0   | 0   | 0.466667 | 0.62069 | 0.173913 | 0.575758 | 0.707317 | 0.426415 | 0     | 0               | <b>0.46875</b> | 0               |
| <b>Kappa</b>                            | 0   | 0   | 0        | 0       | 0        | 0        | 0        | 0        | 0     | 0               | 0              | <b>0.323879</b> |

**Table 17.** Accuracy assessment of Iteration D of farm UTUA20.

| Class Value                             | C_1 | C_2 | C_3 | C_4 | C_5      | C_6      | C_7 | C_8      | C_10     | Total | User's Accuracy | Kappa           |
|-----------------------------------------|-----|-----|-----|-----|----------|----------|-----|----------|----------|-------|-----------------|-----------------|
| C_1 - Coffee                            | 0   | 0   | 1   | 1   | 4        | 15       | 0   | 5        | 2        | 28    | 0               | 0               |
| C_2 - Citrus                            | 4   | 0   | 4   | 1   | 0        | 0        | 0   | 0        | 0        | 77    | 86              | 0               |
| C_3 - Banana                            | 0   | 0   | 15  | 23  | 3        | 0        | 0   | 0        | 0        | 63    | 104             | 0.144231        |
| C_4 - Palm                              | 0   | 0   | 0   | 0   | 0        | 0        | 0   | 0        | 0        | 0     | 0               | 0               |
| C_5 - Grasses/Low Herbaceous Vegetation | 0   | 0   | 1   | 0   | 3        | 5        | 2   | 1        | 2        | 14    | 14              | 0.214286        |
| C_6 - Bare Earth                        | 0   | 0   | 1   | 0   | 0        | 8        | 4   | 9        | 0        | 22    | 22              | 0.363636        |
| C_7 - Paved                             | 0   | 0   | 0   | 0   | 0        | 0        | 4   | 8        | 0        | 12    | 12              | 0.333333        |
| C_8 - Buildings                         | 0   | 0   | 0   | 0   | 0        | 0        | 0   | 93       | 0        | 93    | 93              | 1               |
| C_10 - Overstory Vegetation             | 6   | 0   | 3   | 4   | 1        | 0        | 0   | 0        | 136      | 150   | 150             | 0.906667        |
| <b>Total</b>                            | 10  | 0   | 25  | 29  | 11       | 28       | 10  | 116      | 280      | 509   | 509             | 0               |
| <b>Producer's Accuracy</b>              | 0   | 0   | 0.6 | 0   | 0.272727 | 0.285714 | 0.4 | 0.801724 | 0.485714 | 0     | 0               | <b>0.508841</b> |
| <b>Kappa</b>                            | 0   | 0   | 0   | 0   | 0        | 0        | 0   | 0        | 0        | 0     | 0               | <b>0.371676</b> |

**Table 18.** Accuracy assessment of Iteration E of farm UTUA2.

| Class Value                             | C_1 | C_2      | C_3      | C_4      | C_5      | C_6 | C_7      | C_8      | C_10     | Total | User's Accuracy | Kappa           |
|-----------------------------------------|-----|----------|----------|----------|----------|-----|----------|----------|----------|-------|-----------------|-----------------|
| C_1 - Coffee                            | 7   | 1        | 0        | 4        | 6        | 0   | 0        | 0        | 24       | 42    | 0.166667        | 0               |
| C_2 - Citrus                            | 2   | 10       | 4        | 28       | 4        | 0   | 2        | 1        | 27       | 78    | 0.128205        | 0               |
| C_3 - Banana                            | 0   | 1        | 8        | 6        | 7        | 1   | 16       | 8        | 7        | 54    | 0.148148        | 0               |
| C_4 - Palm                              | 0   | 0        | 0        | 13       | 3        | 0   | 0        | 0        | 58       | 74    | 0.175676        | 0               |
| C_5 - Grasses/Low Herbaceous Vegetation | 0   | 0        | 0        | 1        | 21       | 0   | 0        | 0        | 1        | 23    | 0.913043        | 0               |
| C_6 - Bare Earth                        | 1   | 0        | 1        | 2        | 0        | 9   | 0        | 13       | 1        | 27    | 0.333333        | 0               |
| C_7 - Paved                             | 0   | 0        | 0        | 0        | 0        | 0   | 16       | 2        | 0        | 18    | 0.888889        | 0               |
| C_8 - Buildings                         | 0   | 0        | 0        | 1        | 0        | 0   | 0        | 90       | 0        | 91    | 0.989011        | 0               |
| C_10 - Overstory Vegetation             | 0   | 3        | 4        | 18       | 8        | 0   | 1        | 0        | 66       | 100   | 0.66            | 0               |
| <b>Total</b>                            | 10  | 15       | 17       | 73       | 49       | 10  | 35       | 114      | 184      | 507   | 0               | 0               |
| <b>Producer's Accuracy</b>              | 0.7 | 0.666667 | 0.470588 | 0.178082 | 0.428571 | 0.9 | 0.457143 | 0.789474 | 0.358696 | 0     | <b>0.473373</b> | 0               |
| <b>Kappa</b>                            | 0   | 0        | 0        | 0        | 0        | 0   | 0        | 0        | 0        | 0     | 0               | <b>0.380003</b> |

**Table 19.** Accuracy assessment of Iteration F of farm UTUA2.

| Class Value                             | C_1 | C_2 | C_3      | C_4      | C_5     | C_6 | C_7      | C_8      | C_10     | Total | User's Accuracy | Kappa           |
|-----------------------------------------|-----|-----|----------|----------|---------|-----|----------|----------|----------|-------|-----------------|-----------------|
| C_1 - Coffee                            | 5   | 2   | 3        | 11       | 2       | 0   | 1        | 0        | 17       | 41    | 0.121951        | 0               |
| C_2 - Citrus                            | 1   | 9   | 3        | 21       | 4       | 0   | 1        | 0        | 27       | 66    | 0.136364        | 0               |
| C_3 - Banana                            | 3   | 2   | 6        | 4        | 8       | 1   | 18       | 4        | 9        | 55    | 0.109091        | 0               |
| C_4 - Palm                              | 1   | 0   | 1        | 11       | 7       | 0   | 0        | 0        | 61       | 81    | 0.135802        | 0               |
| C_5 - Grasses/Low Herbaceous Vegetation | 0   | 0   | 0        | 6        | 22      | 0   | 0        | 0        | 0        | 28    | 0.785714        | 0               |
| C_6 - Bare Earth                        | 0   | 0   | 0        | 5        | 0       | 8   | 5        | 16       | 2        | 36    | 0.222222        | 0               |
| C_7 - Paved                             | 0   | 0   | 0        | 0        | 0       | 0   | 8        | 0        | 0        | 8     | 1               | 0               |
| C_8 - Buildings                         | 0   | 0   | 0        | 0        | 0       | 1   | 0        | 94       | 0        | 95    | 0.989474        | 0               |
| C_10 - Overstory Vegetation             | 0   | 2   | 4        | 15       | 6       | 0   | 2        | 0        | 68       | 97    | 0.701031        | 0               |
| <b>Total</b>                            | 10  | 15  | 17       | 73       | 49      | 10  | 35       | 114      | 184      | 507   | 0               | 0               |
| <b>Producer's Accuracy</b>              | 0.5 | 0.6 | 0.352941 | 0.150685 | 0.44898 | 0.8 | 0.228571 | 0.824561 | 0.369565 | 0     | <b>0.455621</b> | 0               |
| <b>Kappa</b>                            | 0   | 0   | 0        | 0        | 0       | 0   | 0        | 0        | 0        | 0     | 0               | <b>0.358437</b> |
